# Supplementary material
Source: Elsevier journal article supplement (https://www.sciencedirect.com/science/article/pii/S0300893224004810)
Supplement: mmc1 [file mmc1.pdf]

# Adherence to the Healthy and Sustainable Dietary Recommendations for the Spanish Population and All-cause Mortality.

## Observational study

### ENRICA cohort

≥18 years. Representative of non-institutionalized Spanish population

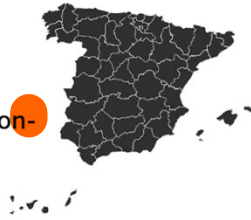

2008–2010

January 2022

Validated diet history

Covariates: age, sex, education, size of municipality, tobacco smoking, BMI, energy intake, alcohol consumption, physical activity, night sleep duration, hypertension, and hypercholesterolemia.

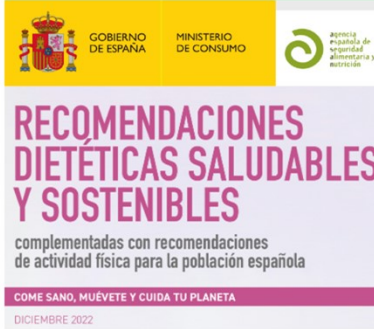

Dichotomous scoring  
Total range: 0 to 20 points

## Adherence to the guidelines index

|                                |                         |                                  |                                    |                         |
|--------------------------------|-------------------------|----------------------------------|------------------------------------|-------------------------|
| Vegetables and fruits $\geq 5$ | Vegetables $\geq 3$     | Potatoes and tubercles, moderate | Cereals, depending on requirements | Prioritize whole grains |
| Legumes $\geq 4$               | Nuts $\geq 3$           | Plant-based protein              | Fish $\geq 3$                      | Prioritize oily fish    |
| Eggs $\leq 4$                  | Dairy $\leq 3$          | Meat $\leq 3$                    | Prioritize white meat              | Olive oil               |
| ↓ Processed meats              | ↓ other processed foods | ↓ salt consumption               | ↓ SBBs                             | Water                   |

## All-cause mortality risk

|                                                | Q1   | Q2 | Q3 | Q4                       |
|------------------------------------------------|------|----|----|--------------------------|
| All population<br>N=11904                      | REF. |    |    | 0.76<br>95%CI: 0.60–0.96 |
| Participants without chronic disease<br>N=6707 | REF. |    |    | 0.48<br>95%CI: 0.31–0.72 |

### Per 2-point increment

|                            |
|----------------------------|
| -7%<br>95% CI: -14 to -1%  |
| -20%<br>95% CI: -30 to -8% |

## Conclusions

- ↑ adherence to the guidelines, approached by a new index, was associated with lower risk of all-cause mortality
- Efforts should be made in promoting adherence to these guidelines, focusing on the recommendations with lower compliance, and evaluating the effectiveness in preventing major chronic health conditions in diverse population subgroups.
